# Supplementary figures and images for: Immunomodulatory effects of chemotherapy on blood lymphocytes and survival of patients with advanced non-small cell lung cancer
Source: PubMed Central journal article supplement — Int J Immunopathol Pharmacol. 2019 Apr 10;33:2058738419839592. doi: 10.1177/2058738419839592 (PMC6458672; doi:10.1177/2058738419839592), 2019-04-10

**A**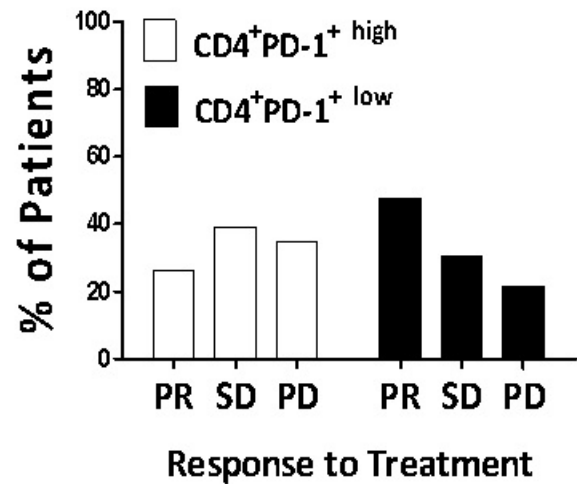**B**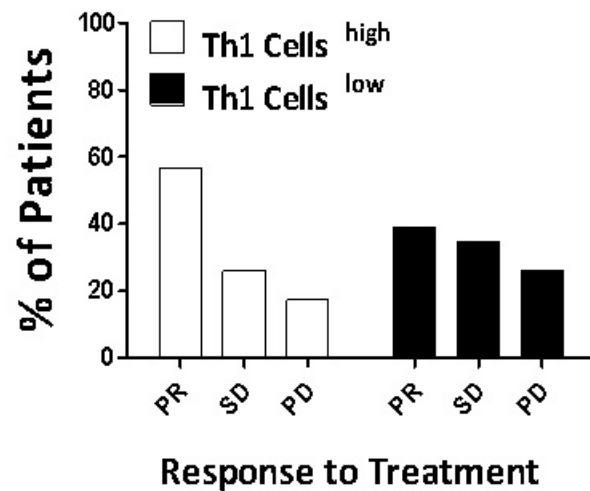**C**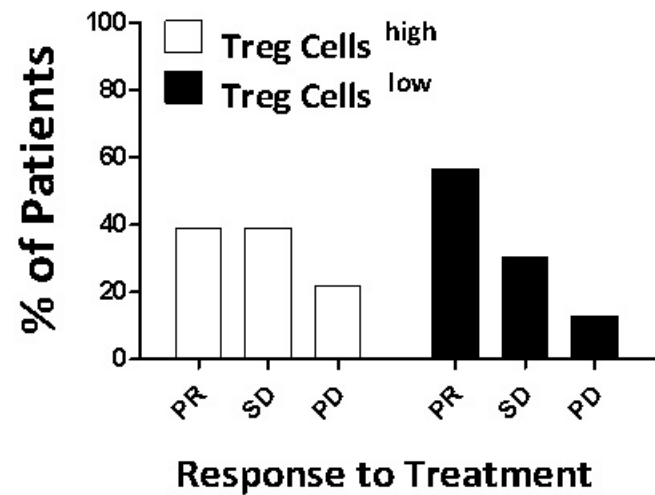

Supplement: Supplementary_Figure_3.pdf [file Supplementary_Figure_3.pdf]
